# Supplementary material
Source: PubMed Central journal article supplement (PMC4038033)
Supplement: NIHMS582089-supplement-Supplemental_Material.pdf [file NIHMS582089-supplement-Supplemental_Material.pdf]

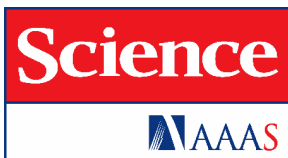

## Supplementary Materials for

### **Association of the Autoimmune Disease Scleroderma with an Immunologic Response to Cancer**

Christine G. Joseph, Erika Darrah, Ami A. Shah, Andrew D. Skora, Livia A. Casciola-Rosen, Fredrick M. Wigley, Francesco Boin, Andrea Fava, Chris Thoburn, Isaac Kinde, Yuchen Jiao, Nickolas Papadopoulos, Kenneth W. Kinzler,\* Bert Vogelstein,\* Antony Rosen\*

\*Corresponding author. E-mail: kinzlike@jhmi.edu (K.W.K.); vogelbe@jhmi.edu (B.V.); arosen@jhmi.edu (A.R.)

Published 5 December 2013 on *Science Express*  
DOI: 10.1126/science.1246886

#### **This PDF file includes:**

Materials and Methods  
Supplementary Text  
Figs. S1 to S5  
Tables S1 to S6  
References (38–44)

## **Supplementary Materials:**

Materials and Methods

Brief clinical descriptions of patients with anti-RPC1 antibodies

Figures S1 to S5

Tables S1 to S6

Supplementary references (38-44)

## **Materials and Methods**

### **Clinical methods**

Consenting scleroderma patients with confirmed cancer diagnoses were recruited from the Johns Hopkins Scleroderma Center. Scleroderma patients met the American College of Rheumatology criteria for scleroderma (38). Existing cancer pathology specimens were obtained from prior surgical procedures performed as part of routine clinical care. The closest serum sample to cancer diagnosis was studied in all patients, and DNA and PBMC samples were obtained in consenting participants. The Johns Hopkins Institutional Review Board approved the acquisition of clinical data and all biological samples for this study.

Demographic and clinical data were abstracted from the Johns Hopkins Scleroderma Center database and careful medical record review. Cancer diagnosis dates and histology were determined by review of the initial diagnostic pathology report. The clinical onset of scleroderma was defined by the first scleroderma symptom, either Raynaud's or non-Raynaud's. The interval between scleroderma onset and cancer diagnosis was calculated for each subject (cancer date – scleroderma onset date). The scleroderma cutaneous subtype and modified Rodnan skin score were defined by established criteria (39, 40). All sera were tested for autoantibodies against RPC1, TOP1, and CENPB as previously described (3). Demographic and clinical data were compared across autoantibody groups, and differences in continuous and dichotomous/categorical variables were assessed by the Kruskal-Wallis and Fisher's exact tests, respectively.

The clinical features and cancer types of the 16 patients evaluated in this study are listed in Table 1. Eight patients were positive for anti-RPC1 antibodies, five for anti-TOP1 antibodies and three for anti-CENPB antibodies. Enhanced nucleolar staining with the anti-RPC1 antibodies (3) was observed in the tumors of all eight patients. No subject was positive for more than one autoantibody. Clinical phenotypic characteristics were representative of those expected in each autoantibody group (e.g. severe diffuse disease in RPC1-positive patients), and patients with RPC1 autoantibodies had a shorter interval between scleroderma onset and cancer diagnosis (median of -0.1 years vs. 13.4 years for patients with TOP1 autoantibodies and 34.0 years for patients with CENPB autoantibodies;  $p=0.05$ ). Seven of the 16 patients had a short interval ( $\pm 2$  years) between scleroderma onset and cancer diagnosis, and 6 of these 7 patients (85.7%) were positive for anti-RNA polymerase III antibodies.

### **Preparation of Illumina genomic DNA libraries**

Genomic DNA libraries were prepared following Illumina's (Illumina, San Diego, CA) suggested protocol with the following modifications. (1) 50 to 75 microliters ( $\mu$ l) of genomic DNA from tumor or normal cells in a total volume of 100  $\mu$ l TE was fragmented in a Covaris sonicator (Covaris, Woburn, MA) to a size of 100 to 500 bp. DNA was purified with a Nucleospin Extract II kit (Cat # 740609, Macherey-Nagel, Germany) and eluted in 50  $\mu$ l of elution buffer included in the kit. (2) 45  $\mu$ l of purified, fragmented DNA was mixed with 40  $\mu$ l of H<sub>2</sub>O, 10  $\mu$ l End repair reaction buffer and 5  $\mu$ l of End Repair enzyme. All reagents used for this step and those described below were from New England Biolabs (NEB cat# E6040, Ipswich, MA) unless otherwise specified. The 100  $\mu$ l end-repair mixture was incubated at 20°C for 30 min, purified by a PCR purification kit (Cat # 28104, Qiagen) and eluted with 42  $\mu$ l of elution buffer (EB). (3) To A-tail, all 42  $\mu$ l of end-repaired DNA was mixed with 5  $\mu$ l of 10 x dA-Tailing Reaction buffer and 3  $\mu$ l of Klenow Fragment (3' to 5' exo-). The 50  $\mu$ l mixture was incubated at 37°C for 30 min before DNA was purified with a MinElute PCR purification kit (Cat # 28004, Qiagen). Purified DNA was eluted with 27  $\mu$ l of 70°C EB. (4) For adaptor ligation, 25  $\mu$ l of A-tailed DNA was mixed with 10  $\mu$ l of PE-adaptor (Illumina), 10  $\mu$ l of 5x Ligation buffer and 5  $\mu$ l of Quick T4 Ligase. The ligation mixture was incubated at room temperature (RT) or 20°C for 15 min. (5) To purify adaptor-ligated DNA, 50  $\mu$ l of ligation mixture from step (4) was mixed with 200  $\mu$ l of NT buffer from NucleoSpin Extract II kit (cat# 636972, Clontech, Mountain View, CA) and loaded into a NucleoSpin column. The column was centrifuged at 14000 g in a desktop centrifuge for 1 min, washed once with 600  $\mu$ l of wash buffer (NT3 from Clontech), and centrifuged again for 2 min to dry completely. DNA was eluted in 50  $\mu$ l elution buffer included in the kit. (6) To obtain an amplified library, ten or twenty PCRs of 50  $\mu$ l each were set up, each including 30  $\mu$ l of H<sub>2</sub>O, 2.5  $\mu$ l dimethyl sulfoxide (DMSO), 10  $\mu$ l of 5 x Phusion HF buffer, 1.0  $\mu$ l of a dNTP mix containing 10 mM of each dNTP, 0.5  $\mu$ l of Illumina PE primer #1, 0.5  $\mu$ l of Illumina PE primer #2, 0.5  $\mu$ l of Hot Start Phusion polymerase, and 2.5 or 5  $\mu$ l of the DNA from step (5). The PCR program used was: 98°C 1 minute; 10 to 16 cycles of 98°C for 20 seconds, 65°C for 30 seconds, 72°C for 30 seconds; and 72°C for 5 min. To purify the PCR product, 250  $\mu$ l PCR mixture (from the ten PCR reactions) was mixed with 500  $\mu$ l NT buffer from a NucleoSpin Extract II kit and purified as described in step (5). Library DNA was eluted with 70°C elution buffer and the DNA concentration was estimated by absorption at 260 nm.

### **Target DNA enrichment**

The targeted regions included all 53 exons of CENPB, *POLR3A*, TOP1. Capture probes were designed (41) to capture both the plus and the minus strand of the DNA and had a 33-base overlap and were custom-synthesized by Agilent Technologies en masse on a solid phase and used for capture, essentially as described (42). Approximately 3  $\mu$ g of library DNA was used per capture. After washing, the captured libraries were ethanol-precipitated and redissolved in 20  $\mu$ l of Tris-EDTA (TE) buffer. The DNA was then amplified in a PCR mix containing 51  $\mu$ l of

distilled water (dH<sub>2</sub>O), 20 µl of 5× Phusion buffer, 5 µl of dimethyl sulfoxide (DMSO), 2 µl of 10 mM dNTPs, 50 pmol of Illumina forward and reverse primers, and 1 µl of HotStart Phusion enzyme (New England Biolabs) with the following cycling program: 98°C for 30 s; 15 cycles of 98°C for 25 s, 65°C for 30 s, 72°C for 30 s; and 72°C for 5 min. The amplified PCR product was purified with a NucleoSpin column (Macherey Nagel Inc.) according to the manufacturer's suggested protocol, except that the NT buffer was not diluted and the DNA bound to the column was eluted in 45 µl of elution buffer. The captured libraries were quantified using an Agilent BioAnalyzer.

### **Somatic mutation identification and LOH analysis**

Captured DNA libraries were sequenced with the Illumina GAIIX Genome Analyzer. Sequencing reads were analyzed and aligned to human genome hg18 with the Eland algorithm in CASAVA 1.6 software (Illumina). A mismatched base was identified as a mutation only when (i) it was identified by ten or more distinct pairs; (ii) the number of distinct tags containing a particular mismatched base was at least 2.5% of the total distinct tags; and (iii) it was not present in >0.5% of the tags in the matched normal sample. Mutations were confirmed by amplification of the relevant region with a single primer pair and evaluated as described in (43). LOH analysis was performed in a similar way, using the primer pairs described in table S3. A patient was considered "informative" for the SNP if DNA from the normal tissue of that patient was heterozygous for the SNP. A tumor was determined to have undergone LOH if >75% of the informative primer pairs in that patient had an allelic ratio less than the mean minus 2 standard deviations of those measured in control individuals without scleroderma. Note that this analysis can only assess allelic imbalance, i.e., a gain in one allele or a loss in the other allele, though it is often (including in the current study) interpreted as LOH, i.e., *loss* of an allele.

### **Peptide microarray**

All experiments with the peptide microarray were performed at ProImmune Inc. (Oxford, UK). Peptides were synthesized as 15-mers with 10 overlapping amino acids from the previous peptide, spanning the entire RPC1 protein. Peptides were printed on glass slides with multiple arrays per slide separated with gaskets, allowing for multiple donor sera to be tested per slide. Donor serum was diluted 1:100, 1:500 and 1:1000 and incubated on the array. A fluorescent anti-Human IgG antibody was used as a secondary antibody, results were detected using a CCD camera and analysis was done using MS Excel. Peptides were determined to be potential binders if the normalized average signal intensity was greater than 4X the respective background negative control. Binding was considered positive if the signal intensity was 4X background for all three serum dilutions.

### **Autoantibody analysis**

RPC1 antibodies were assayed by ELISA using a commercially available kit (Inova Diagnostics). CENP and TOP1 autoantibody assays were performed as described in (3). To



define whether patient antibodies recognized patient-specific mutated forms of RPC1, full-length wild type human *POLR3A* cDNA was purchased from Origene, and site-directed mutagenesis was performed to generate the three different RPC1 mutants, each with a single point mutation: E1072Q, K1365N and I104T, corresponding to the tumor mutations detected in patients SCL-2, SCL-4 and SCL-42, respectively. All were sequence verified before use. <sup>35</sup>S-methionine-labeled products were generated from the wild type and mutant DNAs by IVTT reactions (Promega kit). Prior to use in immunoprecipitations, the radiolabeled proteins were electrophoresed on SDS-PAGE gels and visualized by fluorography. The radiolabeled signal generated by each of these products was similar (1 µl of E1072Q equivalent to: 1.1, 1.2 and 1.7 µl of I104T, wt and K1365N, respectively). Equivalent radioactive amounts <sup>35</sup>S-methionine-labeled wt and mutated RPC1 proteins were used in immunoprecipitations performed as described in (44) with sera from three cancer scleroderma patients. One µl of each serum was used to immunoprecipitate the wild-type form of *RPC1* as well as the specific *RPC1* mutation found in the tumor from that patient.

### **Cell culture, stimulation and flow cytometry**

PBMCs were freshly isolated from whole blood by density-gradient centrifugation (Ficoll-Paque Plus, GE Healthcare), and were used fresh (SCL-42) or frozen (SCL4 and SCL2). For each patient, PBMCs from a donor expressing one matching HLA-DRB1 allele was selected and used as a control. Cells were resuspended to a concentration of  $1.5 \times 10^6$  cells/150µl in RPMI medium supplemented with serum, 2mM L-glutamine, 100 U/ml penicillin, and 100 µg/ml streptomycin, and were plated onto 96-well flat bottom plates. 1 µg/ml anti-human CD40 blocking antibody (G28.5, Biolegend) was added, and after 30 minutes, cells were stimulated for 18 hours as indicated: 4 µg/ml wild-type or mutant patient-matched RPC1 peptide, 4 µg/ml of peptidyl arginine deiminase 4 (PAD4) peptide as a negative control, or 4 µg/ml of a pool of class-II peptides from infectious agents antigens (CEFT) (Axxora) as a positive control. Peptide storage buffer was used for the unstimulated control. HLA restriction was assessed by stimulating cells in the presence of 1 µg/ml anti-HLA-DR blocking antibody (L243, Biolegend) or 1 µg/ml IgG-2a κ isotype control (MOPC-173, Biolegend).

Cells were washed with PBS after stimulation, stained with live/dead fixable blue dead cell stain (Molecular Probes), and then stained with BV510-conjugated CD3 antibody (OKT3, BioLegend), Pacific Blue-conjugated anti-CD4 antibody (RPA-T4, BD Pharmingen), APC-H7-conjugated anti-CD8 (SK1, BD), and PE-conjugated anti-CD154 antibody (TRAP1, BD Pharmingen). FACS analysis was performed on FACS Aria flow cytometer-cell-sorter using FACSDiva (Becton Dickinson) and FlowJo software (Tree Star Inc. Ashland, OR, USA).

### **TCR spectratyping**

The diversity of CDR3 regions for 22 TCR Vβ regions was assessed using the TCRExpress Quantitative Analysis Kit (Biomed Immunotech, Tampa FL). Briefly, RNA was isolated from SCL-42 PBMCs after culture for 6 days with wt or mutant peptides (Invitrogen, Carlsbad

CA), and cDNA was generated using random hexamers (Invitrogen) and You Prime First Strand Beads (GE, Buckinghamshire UK) following the manufacturers protocols. CDR3 regions were amplified from cDNA using two rounds of PCR with V $\beta$ -family specific PCR primers as per the manufacturer's instructions. Fragment length analysis was performed by the Johns Hopkins DNA analysis facility. The distribution of CDR3 lengths for each V $\beta$ -family was determined and expressed as "proportion of TCR". Peaks were considered to be antigen-driven when the observed proportion of a given fragment size differed by more than 10% between wt and mutant-stimulated cells.

### **TCR Sequencing**

TCR libraries were prepared for sequencing using a Truseq sample preparation kit following the manufacturer's suggestions with the following modifications. Input DNA was prepared from the PCR products obtained from spectratyping analysis. Product from wells using primers specific to the CDR3 regions of V $\beta$ 3, V $\beta$ 5, V $\beta$ 7, V $\beta$ 12, V $\beta$ 16 and V $\beta$ 24 were purified using a Qiagen PCR purification kit. DNA was eluted in 30  $\mu$ l of 65°C elution buffer. After A-tailing and ligation to adaptors, the library was amplified in six reactions with a PCR mix containing 10  $\mu$ l H<sub>2</sub>O, 1.5  $\mu$ l DMSO, 6  $\mu$ l 5X Phusion buffer, 6  $\mu$ l dNTPs, 3  $\mu$ l each of Forward and Reverse Primers, 3  $\mu$ l Phusion polymerase (2 U/ $\mu$ l) and 2  $\mu$ l ligation reactions, and cycled using the following program, 98°C for 30 s; 14 cycles of 98°C for 10 s, 65°C for 30 s, 72°C for 30 s; and 72°C for 5 min. The resulting product was purified using Ampure beads, quantified with an Agilent Bioanalyzer, and sequenced using an Illumina instrument.

### **qPCR detection of specific TCRs**

Custom Taqman assays for specific TCRs were developed using Primer express v2.0 software and synthesized by Applied Biosystems. For detection of the V $\beta$ 24 J $\beta$ 1.1 wt TCR, a FAM-labeled probe (ACTGAAGCTTTCTTTGGAC), forward primer (GCACCGGGACAGTGATGAA), and reverse primer (GGTCCTCTACAACCTGTGAGTTTGGT) were synthesized. For detection of the V $\beta$ 24 J $\beta$ 1.5 mutant TCR, a FAM-labeled probe (ACAGTAAATCAGCCCCAGC), forward primer (TGTGTGCCACCAGCAGAGA), and reverse primer (AGTCGAGTCCCATCACCAAAA) were synthesized. cDNA from Day 0 SCL-42 PBMCs was prepared as described and was amplified by one round of PCR using V $\beta$ 24-family specific PCR primers (Biomed Immunotech, Tampa FL). Expression of the specific V $\beta$ 24 TCRs was determined in triplicate using standard ABI chemistry and reagents.

## **Clinical descriptions of anti-RPC1 positive patients**

As detailed below, the anti-PRC1 positive scleroderma patients with cancer shared many features, including a short interval between the first clinical signs of scleroderma and cancer diagnosis, aggressive cutaneous disease, and a high risk of scleroderma renal crisis.

### **Patient SCL-1**

Patient 1 palpated a breast mass in the summer of 2005 and was diagnosed with a breast invasive ductal carcinoma on 7/26/05. Around the time of her diagnosis, she developed hypertension, thrombocytopenia, seizures, and renal failure that progressed despite blood pressure control. She ultimately initiated peritoneal dialysis. Her breast cancer was treated with lumpectomy, radiation therapy, and doxorubicin. In October of 2005, she began to notice Raynaud's phenomenon, and in October of 2007, she developed skin thickening. When first seen in our Center on 2/4/08, she was noted to have extensive and severe scleroderma skin thickening with a modified Rodnan skin score (mRSS) of 41 (range is 0-51 with 51 representing most severe disease possible).

### **Patient SCL-2**

Patient 2 was noted to have a mass on a chest radiograph, leading to a diagnosis of a small cell carcinoma of the lung on 3/22/06. She clearly had Raynaud's phenomenon by April 2006. She was treated with chemotherapy (completed 7/06) and radiation therapy with prophylactic brain irradiation (completed 9/06). By April of 2007, she began to notice worsening of her Raynaud's phenomenon and swelling of her hands followed by the onset of rapid, diffuse skin thickening. She was initially treated for her cutaneous disease with mycophenolate mofetil and was noted to have a mRSS of 47 on her visit to our Center on 9/6/07. She later required therapy with cyclophosphamide due to concern for interstitial lung disease, and by 12/13/11, her mRSS had decreased significantly to 5.

### **Patient SCL-4**

Patient 4 had a known BRCA1 mutation and underwent a prophylactic oophorectomy based on her genetic risk. During this procedure, she was found to have stage III ovarian adenocarcinoma with papillary serous features (4/5/06). She completed 6 cycles of paclitaxel and cisplatin in 8/2006, and around this time developed Raynaud's phenomenon. Her chemotherapy course was complicated by the development of pericarditis with tamponade physiology requiring drainage and a pericardial window, and there was no evidence of an infected or malignant effusion. When first seen here on 1/10/08, she was noted to have significant skin disease (mRSS 21), numerous tendon friction rubs, a myopathy, and scleroderma renal crisis with a Cr of 1.9. In 2008-2009, she was treated with a number of immunosuppressive agents targeting her cutaneous, muscle, and joint disease including mycophenolate, methotrexate, azathioprine and hydroxychloroquine, and her skin disease was significantly improved by 8/08. In October 2011, she developed a small bowel obstruction with imaging findings consistent with serosal implants in the context of a

rising CA 125 level. She began weekly carboplatin, and her CA 125 level had normalized by April 2012.

### **Patient SCL-13**

Patient 13 noticed bilateral hand and ankle swelling in May 2005 and Raynaud's phenomenon in August 2005. She was diagnosed with invasive ductal carcinoma of the breast on 8/24/05. She was treated with a mastectomy followed by doxorubicin and cyclophosphamide from 10-12/05. In 01/06, she developed worsening skin thickening in her hands, arthralgias and myalgias and began therapy with d-penicillamine and later methotrexate. She also initiated paclitaxel and trastuzumab for her cancer in 01/06. She was seen at our Center 4/16/07 and was noted to have progressive skin disease (mRSS 30); she was transitioned to mycophenolate for her cutaneous disease and gradually had an improvement in her skin disease (mRSS in 2012 was 2).

### **Patient SCL-35**

Patient 35 was diagnosed with breast ductal carcinoma in situ on 8/16/04, treated with a mastectomy. In April 2006, she developed symptoms consistent with carpal tunnel syndrome, and by 8/06, she had lower extremity skin thickening and tendon friction rubs. Raynaud's phenomenon developed in 1/07. When first seen at our Center in 6/07, her mRSS was 48, and she was on letrozole for her malignancy. After therapy with cyclophosphamide and mycophenolate, her cutaneous disease significantly improved (mRSS 3 by 3/11).

### **Patient SCL-42**

Patient 42 developed arthralgias and skin thickening in her fingers in 3/2007 that rapidly progressed to diffuse skin thickening. In 4/2007 she developed Raynaud's phenomenon also. By 10/07, she developed hypertension requiring ACE-inhibitor therapy, and her mRSS was 18. Despite therapy with mycophenolate, her cutaneous disease progressed, and by 3/08, her mRSS had increased to 37. In 4/08, methotrexate was added to her regimen with some improvement in flexibility and new hair growth; however her mRSS remained at 35 in 7/08. In 9/08, in the setting of increased cutaneous activity, she was diagnosed with a stage II, triple negative, invasive ductal cancer of the breast. She was treated with mastectomy (10/08) and chemotherapy with cyclophosphamide and docetaxel (12/08-2/09). Her cutaneous symptoms gradually improved in the setting of IVIG therapy, and by 12/11 her mRSS was 8.

### **Patient SCL-81**

Patient 81 was diagnosed with an adenocarcinoma of the colon with positive lymph nodes in 5/05 requiring bowel resection and 5-FU and platinum chemotherapy. In 7/09, he developed diffuse cutaneous skin disease and by 11/09 had Raynaud's phenomenon. In 3/10, his mRSS was 46.

### **Patient SCL-82**

Patient 82 developed Raynaud's phenomenon and hand swelling in 1/08 and was noted to have a mRSS of 14 in 8/08 while on methotrexate therapy. By 1/09, the patient was on combination mycophenolate and methotrexate therapy for a mRSS of 18. By 1/10, her skin disease was significant improved (mRSS 5), but she was diagnosed with a ductal carcinoma in situ (DCIS) of the breast on 6/28/10 and treated with a mastectomy.

**Fig. S1. immunoprecipitations of wt and mutant RPC proteins by sera from scleroderma cancer patients.** <sup>35</sup>S-methionine-labeled wt and mutated RPC1 proteins were generated by IVTT (“IVTT Input”). For each radiolabeled RPC1 protein, the amount used for the input gel samples was 1/20 of the amount used for immunoprecipitation. Immunoprecipitates were electrophoresed on SDS-polyacrylamide gels and visualized by fluorography. (A) Immunoprecipitations (performed in duplicate) with patient sera SCL-2, 4 and 42 (“IVTT IP”). The levels of anti-RPC1 antibodies in each of the sera (assayed by ELISA) is listed; values >80 units denote high levels of these antibodies. (B) Immunoprecipitations were performed with the indicated scleroderma patient and control sera (right panel, “IVTT IP”).

**Fig. S2. Peptide array.** Peptides determined to be positive binders (see Methods) are shown in blue. Only peptides that bound to the sera of at least one patient are displayed, however all 276 peptides (table S4) spanning the entire wt RPC sequence, as well as peptides spanning the identified *POLR3A* mutations, were included on the array.

**Fig. S3. The effect of HLA-DR blocking antibodies on activation of CD4+ T cells.** PBMCs from patient SCL-42 were stimulated with patient-matched mutant and corresponding wild-type RPC1 peptides. The PAD4 peptide and the CEFT pool were used as negative and positive controls, respectively. CD4+ T cell responses to RPC1 peptides were reduced by the presence of HLA-DR blocking antibodies (1 ug/ml) but not by an isotype control antibody used at the same concentration.

**Fig. S4. Detection of wt and mutant-specific TCRs by qPCR.** (A) Patient SCL-4 or SCL -42 PBMCs were cultured with patient-specific wt and mutant peptides for six days prior to cDNA isolation and amplification with Vβ24-based primers specific for the TCRs recognizing the wt or mutant forms of *POLR3A* found in patient SCL-42. As indicated. In the lower panel, the relative expression levels of the SCL-42 TCRs following stimulation with the indicated peptides were compared to those of GAPDH and displayed as  $2^{-\Delta Ct}$  (lower panel). (B) Unstimulated patient SCL-42 PBMCs were used to generate cDNA which was then amplified with Vβ24-based primers specific for the TCRs recognizing the wt or mutant forms of *POLR3A* found in patient SCL-42. In the lower panel, the same cDNA was used to amplify the TCR-β constant region as a positive control.

**Fig. S5. Mutant and wild type peptide-specific CD4+ T cells in patient SCL2.** CD154 expression on CD4+ T cells was assayed by flow cytometry after stimulation (18 h) with patient-specific wild type or mutant RPC1 peptides, or a pool of peptides from infectious agent antigens (CEFT, positive control). Gate frequencies are expressed as percentage of CD4+ T cells.

**Table S1.** Demographic and clinical characteristics grouped by autoantibody status

**Table S2.** Primers used for loss of heterozygosity analysis.

**Table S3.** Allelic ratios of SNP loci within and closely surrounding the TOP1 gene.

**Table S4.** Synthetic peptides assessed for antibody reactivity.

**Table S5.** MHC types of the patients with RPOL3A mutations.

**Table S6.** Patient-specific MHC class I and class II peptides with highest predicted binding affinity

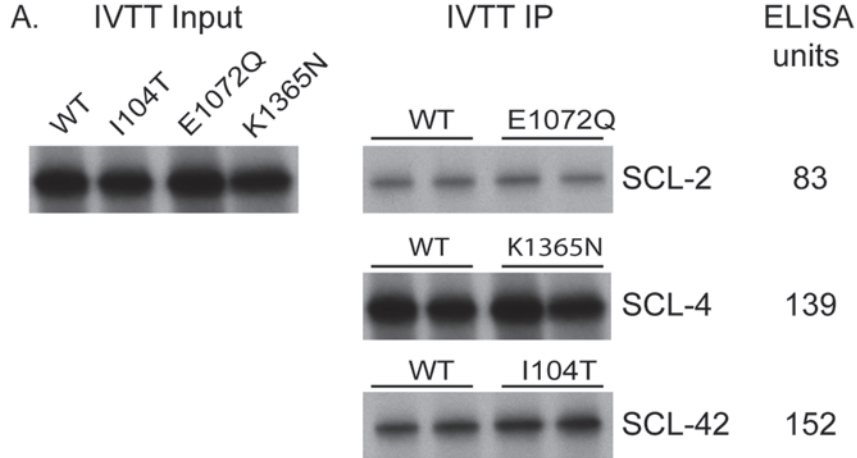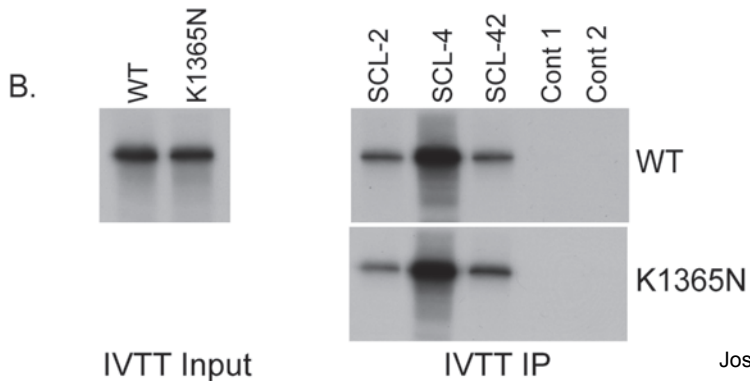



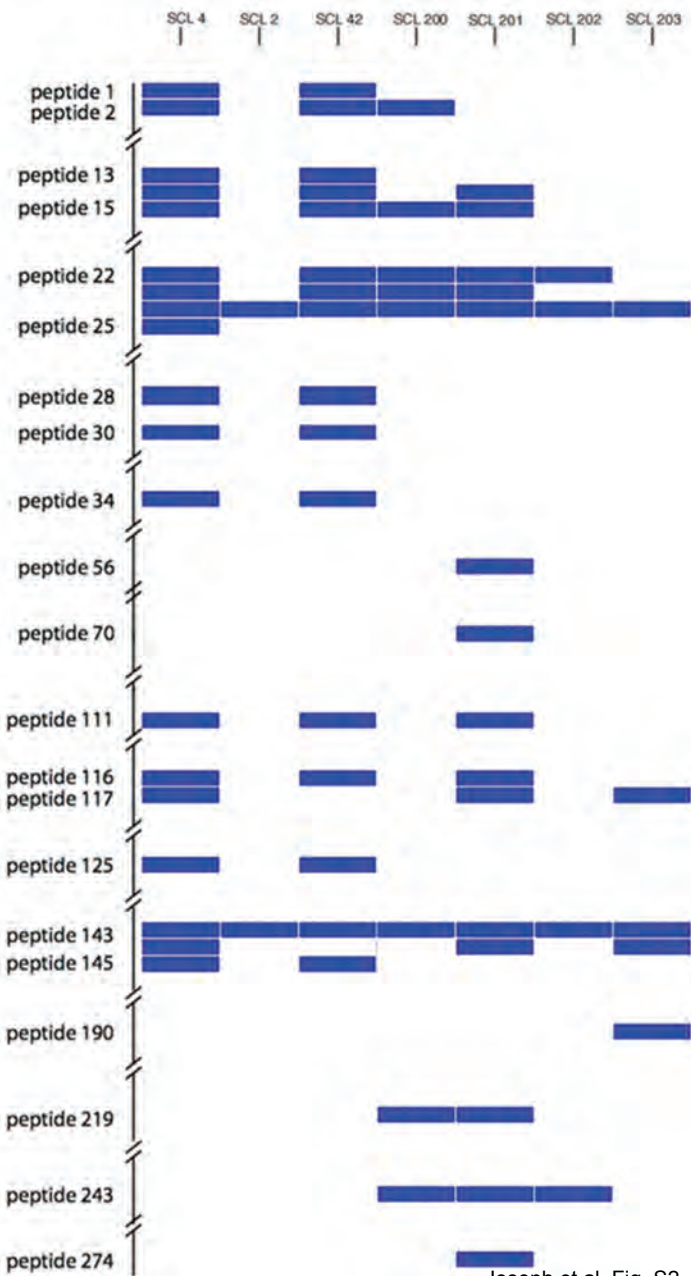

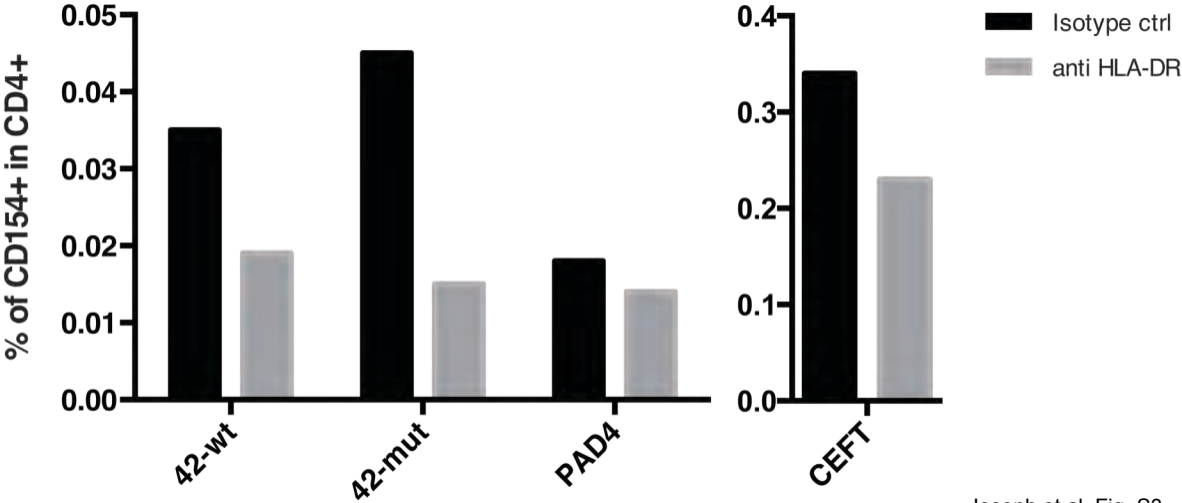

## Amplification primers specific for wt-responsive TCR

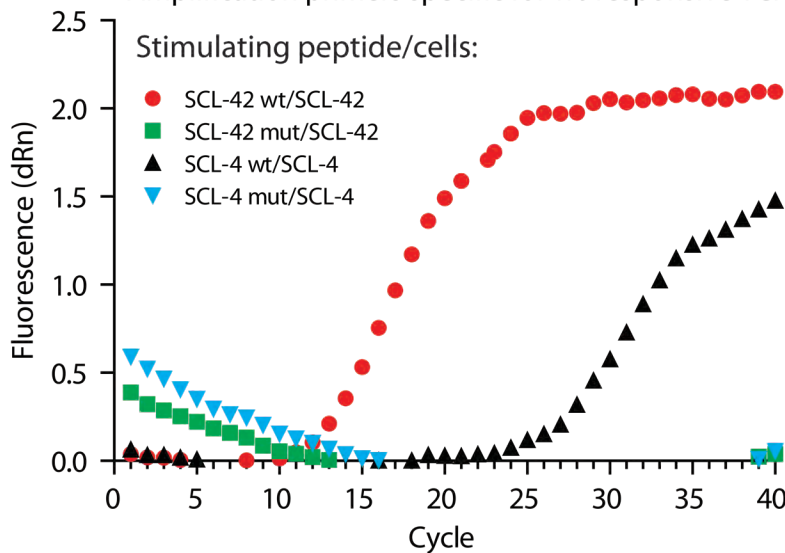

## Amplification primers specific for mut-responsive TCR

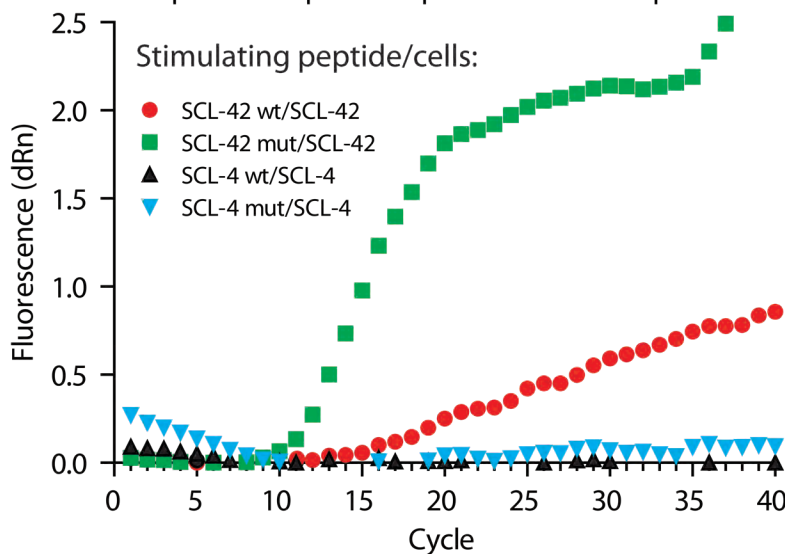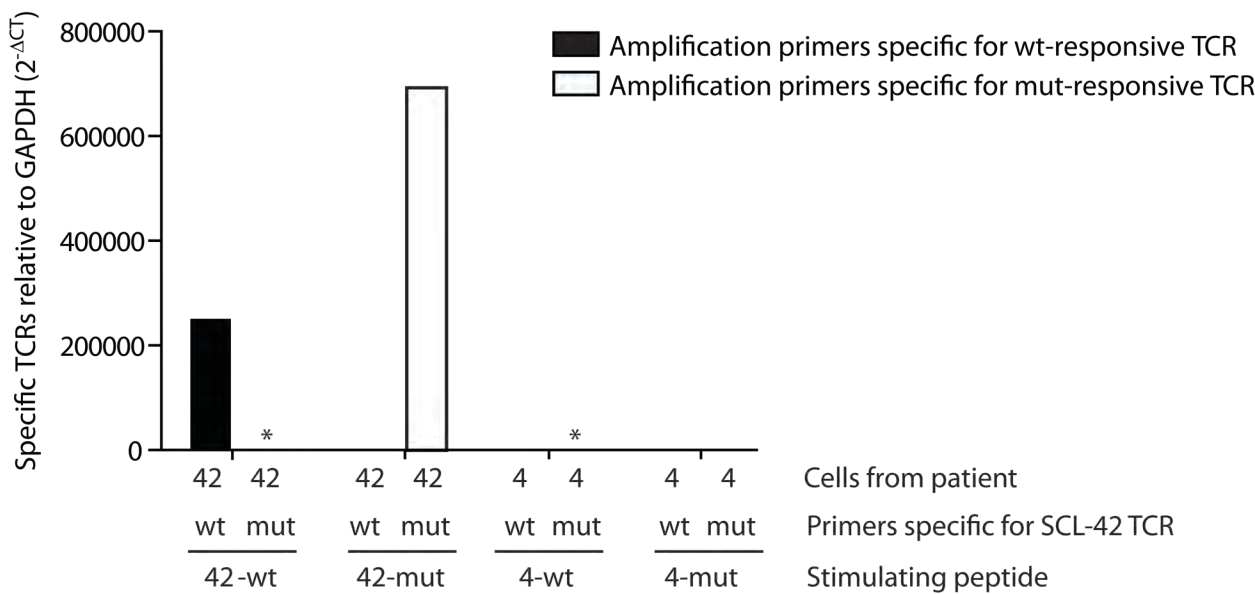

B

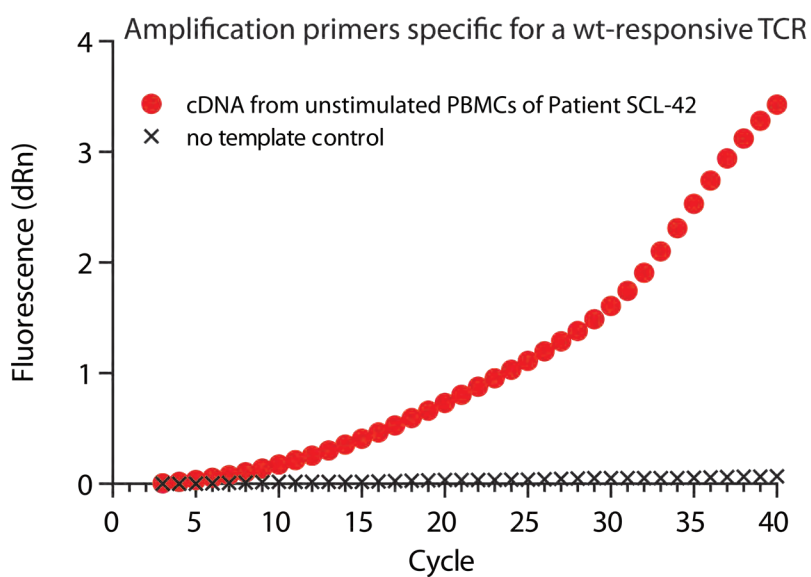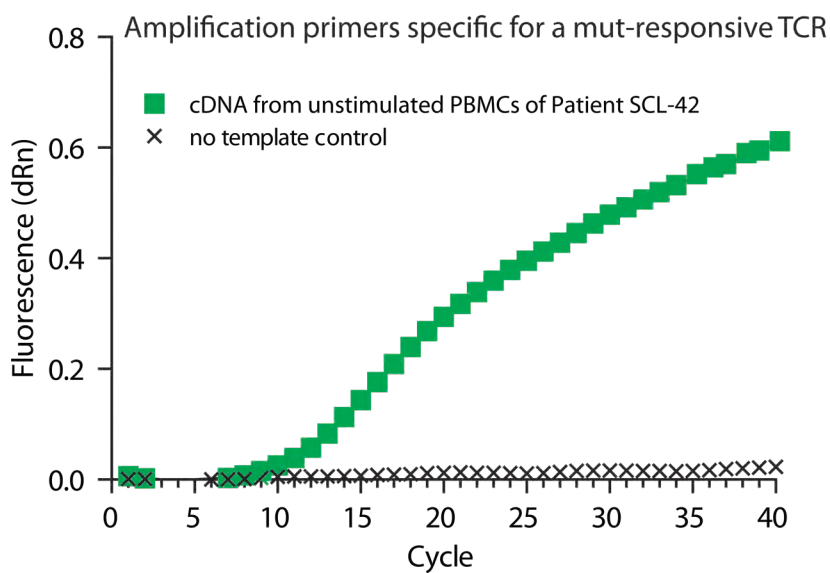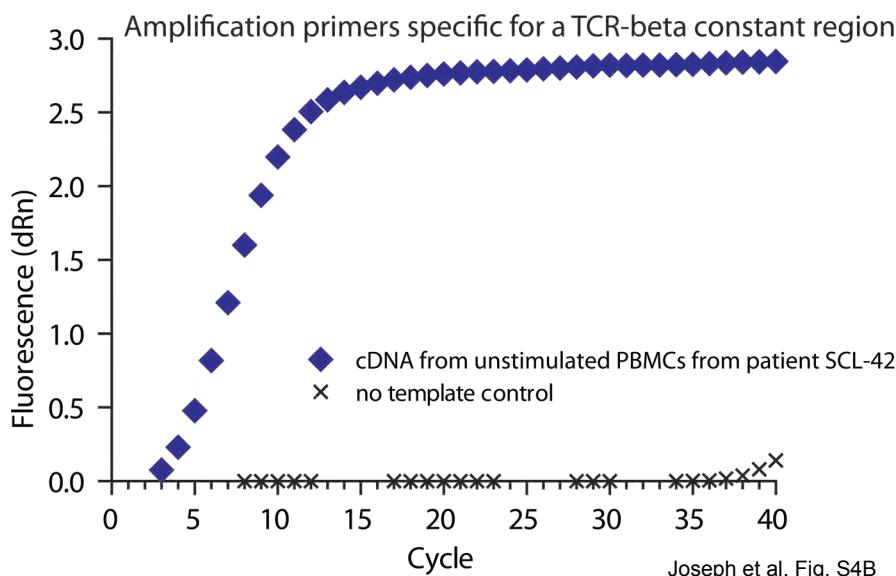

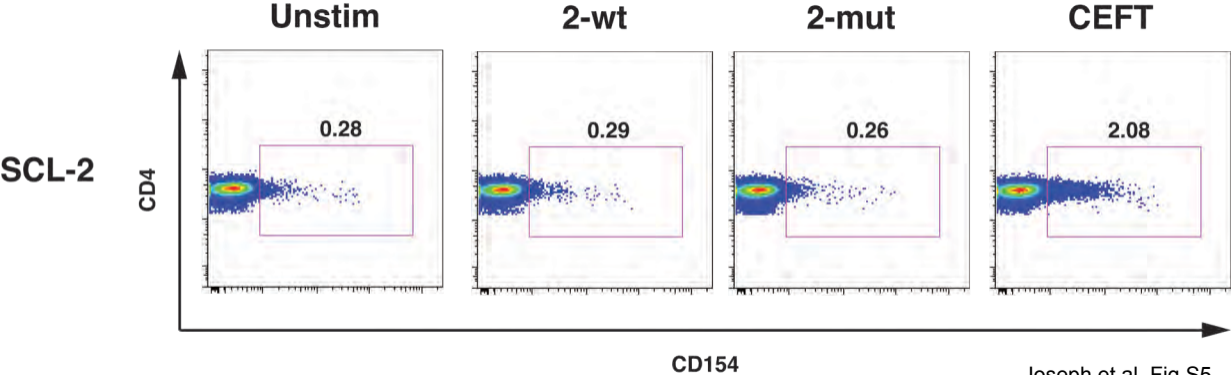

**Table S1. Demographic and clinical characteristics grouped by autoantibody status**

|                                                                                | RPC1 (N=8)                               | TOP1 (N=5)           | CENPB (N=3)                      | p-value |
|--------------------------------------------------------------------------------|------------------------------------------|----------------------|----------------------------------|---------|
| Age at scleroderma onset, median (range), years                                | 49.7<br>(42.4, 58.8)                     | 42.4<br>(37.0, 65.3) | 34.5<br>(27.3, 45.6)             | 0.12    |
| Age at cancer diagnosis, median (range), years                                 | 50.9<br>(42.3, 54.6)                     | 65.1<br>(52.1, 74.6) | 64.2<br>(43.1, 68.6)             | 0.03    |
| Interval between scleroderma onset and cancer diagnosis, median (range), years | -0.1<br>(-4.2, 2.5)                      | 13.4<br>(0.4, 34.0)  | 34.0<br>(-2.5, 36.9)             | 0.05    |
| Sex, no. (%) female                                                            | 7 (87.5)                                 | 5 (100)              | 3 (100)                          | 1.0     |
| Race, no. (%)                                                                  |                                          |                      |                                  |         |
| White                                                                          | 8 (100)                                  | 3 (60)               | 3 (100)                          | 0.23    |
| Black                                                                          | 0 (0)                                    | 1 (20)               | 0 (0)                            |         |
| Asian                                                                          | 0 (0)                                    | 1 (20)               | 0 (0)                            |         |
| Scleroderma classification, no. (%)                                            |                                          |                      |                                  |         |
| Limited                                                                        |                                          |                      |                                  | 0.003   |
| Diffuse                                                                        | 0 (0)                                    | 3 (60)               | 3 (100)                          |         |
| Ever smoker, no. (%)                                                           | 8 (100)                                  | 2 (40)               | 0 (0)                            | 1.0     |
| Maximum mRSS, median (range)                                                   | 2 (25)                                   | 2 (40)               | 1 (33.3)                         |         |
| Renal crisis, no. (%)                                                          | 38 (18, 48)                              | 6 (4, 27)            | 4 (2, 10)                        | 0.006   |
| Immunosuppressive therapy, ever use, no. (%)                                   |                                          |                      |                                  |         |
| Methotrexate                                                                   | 3 (37.5)                                 | 0 (0)                | 0 (0)                            | 0.24    |
| Mycophenolate                                                                  |                                          |                      |                                  |         |
| IVIg                                                                           | 4 (50)                                   | 1 (20)               | 0 (0)                            | 0.39    |
| Cyclophosphamide                                                               | 6 (75)                                   | 0 (0)                | 0 (0)                            | 0.008   |
|                                                                                | 1 (12.5)                                 | 0 (0)                | 0 (0)                            | 1.0     |
|                                                                                | 1 (12.5)                                 | 2 (40)               | 0 (0)                            | 0.39    |
| Cancer types                                                                   | 5 Breast<br>1 Lung<br>1 Ovary<br>1 Colon | 4 Breast<br>1 Lung   | 1 Breast<br>1 Anal<br>1 Lymphoma | N/A     |

RP = Raynaud's phenomenon; mRSS = modified Rodnan skin score

**Table S2.** Primers used for loss of heterozygosity analysis

| SNP Symbol | Related Gene | Coordinates    | Distance (bp)* | Forward primer sequence**  | Reverse primer sequence** |
|------------|--------------|----------------|----------------|----------------------------|---------------------------|
| rs1054608  | POLR3A       | chr10:79213314 | -193928        | TGGACACACATCTTTCAGATTCA    | CAAGATTTGGACTCAGCAGTTG    |
| rs2579153  | POLR3A       | chr10:79218272 | -188970        | GCTACTTTTCTGGCCTGTGG       | AGGGAGAAGCTAAAGGGGAACC    |
| rs2165046  | POLR3A       | chr10:79222098 | -185144        | AGAATGCTGTGCTGTGGATG       | GTGCTTCTGGGCTCTGGTT       |
| rs10762763 | POLR3A       | chr10:79230809 | -176433        | TGAGGTCAGCTGAGTCTGTGG      | GGATTTTCAGGGCTCCGAGT      |
| rs2289311  | POLR3A       | chr10:79235661 | -171581        | GTGTCTGGCCACCTTTG          | ATTCTTGGTCCATCTGTGG       |
| rs10824579 | POLR3A       | chr10:79260691 | -146551        | CTCCTTTTCCAAGTGGGATTC      | CTGCCTCGTGAAGTTTCCAGA     |
| rs1248888  | POLR3A       | chr10:79323400 | -83842         | TGTATCAATGGGCAGCAGTG       | TATGTCTATTCTGCCCCCAAG     |
| rs2241547  | POLR3A       | chr10:79406970 | -272           | CCGATGGATGTATGCAGTGA       | TTGTTTGTCTGCTTGAACCT      |
| rs3815891  | POLR3A       | chr10:79415795 | 0              | TCTACTTGGGTGGGGGTGAT       | CTCCAAGACGGTTAGAACC       |
| rs7094028  | POLR3A       | chr10:79419810 | 0              | AACACAAGAAGCGAGGAGCTT      | AAGATCAGCAGGCCAAAGAA      |
| rs2818827  | POLR3A       | chr10:79424105 | 0              | TGCTGTGGCTTTGTGTCTTC       | GTGTTTGTCTGGCCCACTC       |
| rs2493568  | POLR3A       | chr10:79442860 | 0              | TCGTCTTCTTAGAGGATGCAGTATT  | TGCCTCACTATCACCGATCTC     |
| rs4979801  | POLR3A       | chr10:79514072 | 54901          | CCGTTGAGATTCACTCTCTCTCT    | TTGTTTAAAATTTCCCTGCTCTCT  |
| rs2253909  | POLR3A       | chr10:79546360 | 87189          | TGGATTGATTAACAGATGTTAAGGTT | CAGAAGGGCCGTTTACACTC      |
| rs2253513  | POLR3A       | chr10:79549686 | 90515          | AGCATGTCTGAGCCTCTTTTTC     | CAGCAAAGCAGCAACAAAG       |
| rs2114907  | POLR3A       | chr10:79573735 | 114564         | CACTCTCTCCACCACAAGCA       | TTGGCCACCATCAGTAAGAAC     |
| rs1249134  | POLR3A       | chr10:79615946 | 156775         | AGAATGGGCCTCTTTGGACT       | CAGGGAGCTGTTTTCCAGGTG     |
| rs1249126  | POLR3A       | chr10:79618728 | 159557         | ACACTGTGGGGAGGGAAAA        | AGCATTCTGGCCTCTCTGT       |
| rs2434123  | POLR3A       | chr10:79654802 | 195631         | GCCATCTAGTCTGCGAAAGG       | GTGGGAGAAAGTCAGTTGAATAAA  |
| rs2865899  | TOP1         | chr20:38898952 | -192170        | CTCCATCGCCCTAGACTGAA       | CTGCTGCAGGAGTCCACAC       |
| rs6029375  | TOP1         | chr20:38899311 | -191811        | CCTCATCATCTGGCACCTCT       | AGTGACCTCACACATTGAGGAGT   |
| rs1005533  | TOP1         | chr20:38920524 | -170598        | TCATTGTGTGGGTTTGTGTG       | CTCCTTATGCCTCCCCTGA       |
| rs1109393  | TOP1         | chr20:38927262 | -163860        | GGGAGCTGACCCAATCCAG        | CCTGAAGGTTGCCCATAAAA      |
| rs6029395  | TOP1         | chr20:38929002 | -162120        | CCCAGGTCTTCAAACACAG        | ACTGGAAGCTGCCACTTGAG      |
| rs6129694  | TOP1         | chr20:38931100 | -160022        | CCACATTTAGAGCCAGAG         | GCCAAGGCTACACATGGTTT      |
| rs4142346  | TOP1         | chr20:38947279 | -143843        | TTTTAACTACTACATACCCCCATGTC | CCCTCTTCCATCCCCTATT       |
| rs6129700  | TOP1         | chr20:38954995 | -136127        | CCAAGCCAATTTTCAAAGA        | GCATCCTCAGGCTGTTTGAC      |
| rs6124288  | TOP1         | chr20:38955031 | -136091        | GGGATGTGCACTGAAACTGAT      | TCAACTCAGCTCAAGGATTGC     |
| rs2207309  | TOP1         | chr20:39011156 | -79966         | TGGGGGACAACTTTTAGGG        | GGCTAGGAGTTGCCTTCAATC     |
| rs6072263  | TOP1         | chr20:39138960 | 0              | ACTTTCACCCCTGACTCACTG      | ACACAAAGGATACACACACACA    |
| rs6129731  | TOP1         | chr20:39094101 | 0              | TCTGGAAGATGTGGTGTGGT       | GACATGTCTGGGCATAATTAACA   |
| rs6029549  | TOP1         | chr20:39188109 | 2758           | GTCCAAGAACAGGCCAGATG       | GGAGAAAAGCCAAGTCAGCA      |
| rs926345   | TOP1         | chr20:39205361 | 20010          | TGCCTCTGCTGTCACTGTTC       | CCTCACTCCCTTCCCTCAAC      |
| rs3795128  | TOP1         | chr20:39207577 | 22226          | TCTGGGAAGCAAGTGTGATG       | AACCCATGGCCCTACTTGAG      |
| rs6093446  | TOP1         | chr20:39214346 | 28995          | GGAGAGGGTGATTGGTGAGA       | GGGAAAAACAGTAAAGCAGCA     |
| rs2076148  | TOP1         | chr20:39222269 | 36918          | CAGGCTTCTCTCCAGGTG         | CCGGGCAGCTACTTAGAGG       |
| rs6124323  | TOP1         | chr20:39227903 | 42552          | TTCTCGTGCAGAGAGTG          | CTCTGGGTGATGTGATGTCTGT    |
| rs2235367  | TOP1         | chr20:39263536 | 78185          | GAGGCTGGGAAGTCACTGAC       | TTTTGTTCCTCAGTTTCTCTGGA   |
| rs6029610  | TOP1         | chr20:39348159 | 162808         | TGTTGAGAATGCATTTCTTGAAT    | TAAGTGGCTAATTTTGGGTAATGG  |
| rs4812493  | TOP1         | chr20:39382799 | 197448         | ATTGGAATGGGCTACACCTG       | CCCACCAAAGCCTAAAGAT       |
| rs4810312  | TOP1         | chr20:39402121 | 216770         | GGTCTTTGGTCCAGGAAAGC       | GGACAGGTGAGCCAGGT         |
| rs6029636  | TOP1         | chr20:39402927 | 217576         | GGTCTTTCCAGGGAGTGGAG       | CTCAGTCACTTGGCGCTTC       |
| rs12625565 | TOP1         | chr20:39419499 | 234148         | TGGAGCTGCCTTGGAGTAAC       | CAGCCAGGCACTCACAG         |
| rs2072966  | TOP1         | chr20:39436751 | 251400         | GATTGGAGCTGACTCAGAAAT      | CAGGCTGAGGACTTGAGGAG      |

\* Distance between the SNP and the indicated gene is listed as "0" if the SNP was within the coding region of the gene. Otherwise, the distance listed represents that between the SNP and the ATG of the coding sequence (negative numbers) or the SNP and the stop codon (numbers >0).

\*\* 5'-cacacaggaacagctatgacctatg was added to 5'-end of Forward PCR primers and 5'-cgactgaaacagcagccagctNNNNNNNNNNNNNNNNNN was added to the 5'-end of Reverse PCR primers to enable the second amplification step, as described in (40).

**Table S3. Allelic ratios of SNP loci within and closely surrounding the *TOP1* gene.**

|                               |           | Patients with RPC-1 antibodies |            |             |             |             |             |            |             | Patients without RPC-1 antibodies |             |            |             |            |             |           |             |
|-------------------------------|-----------|--------------------------------|------------|-------------|-------------|-------------|-------------|------------|-------------|-----------------------------------|-------------|------------|-------------|------------|-------------|-----------|-------------|
| Chr 20 position               | SNP ID    | SCL-1                          | SCL-2      | SCL-4       | SCL-13      | SCL-35      | SCL-42      | SCL-81     | SCL-82      | SCL-5                             | SCL-8       | SCL-11     | SCL-12      | SCL-19     | SCL-24      | SCL-32    | SCL-85      |
| 38,898,952                    | rs2865899 | NI                             | NI         | 103%        | NI          | NI          | NI          | 98%        | NI          | NI                                | NI          | NI         | 103%        | NI         | NI          | NI        | NI          |
| 38,899,311                    | rs6029375 | NI                             | NI         | 103%        | NI          | 102%        | 103%        | 96%        | 103%        | NI                                | NI          | NI         | NI          | 98%        | 104%        | NI        | NI          |
| 38,920,524                    | rs1005533 | NI                             | NI         | 102%        | NI          | 101%        | 102%        | 93%        | 99%         | NI                                | NI          | NI         | 103%        | 96%        | 104%        | NI        | NI          |
| 38,931,100                    | rs6129694 | NI                             | NI         | 101%        | 95%         | NI          | NI          | 87%        | NI          | NI                                | NI          | NI         | NI          | 104%       | NI          | NI        | NI          |
| 38,947,279                    | rs4142346 | NI                             | NI         | 101%        | NI          | 102%        | 103%        | NI         | 96%         | 103%                              | NI          | NI         | NI          | NI         | NI          | NI        | NI          |
| 38,954,995                    | rs6129700 | NI                             | NI         | 99%         | NI          | 103%        | 101%        | NI         | NI          | NI                                | NI          | NI         | NI          | NI         | 103%        | NI        | NI          |
| 38,955,031                    | rs6124288 | NI                             | NI         | 101%        | NI          | 103%        | NI          | NI         | 101%        | NI                                | NI          | NI         | NI          | 102%       | 102%        | NI        | NI          |
| 39,011,156                    | rs2207309 | NI                             | NI         | 104%        | 104%        | NI          | NI          | NI         | NI          | 93%                               | 101%        | 99%        | NI          | NI         | 103%        | NI        | NI          |
| 39,094,101                    | rs6129731 | NI                             | NI         | NI          | NI          | NI          | NI          | 95%        | NI          | NI                                | NI          | NI         | 101%        | NI         | NI          | NI        | 104%        |
| 39,138,960                    | rs6072263 | 81%                            | NI         | NI          | 104%        | NI          | 102%        | 94%        | NI          | NI                                | NI          | NI         | NI          | 104%       | NI          | NI        | 104%        |
| 39,188,109                    | rs6029549 | 83%                            | NI         | NI          | 102%        | NI          | NI          | 98%        | NI          | NI                                | NI          | NI         | NI          | 98%        | NI          | NI        | 98%         |
| 39,205,361                    | rs926345  | 100%                           | NI         | NI          | 104%        | NI          | 100%        | 95%        | NI          | 98%                               | NI          | NI         | NI          | NI         | NI          | NI        | 98%         |
| 39,207,577                    | rs3795128 | 86%                            | NI         | NI          | 104%        | NI          | 104%        | 94%        | NI          | 103%                              | NI          | NI         | NI          | 95%        | NI          | NI        | 102%        |
| 39,214,346                    | rs6093446 | NI                             | NI         | NI          | NI          | NI          | NI          | NI         | NI          | 83%                               | NI          | 103%       | 96%         | NI         | NI          | NI        | 98%         |
| 39,222,269                    | rs2076148 | 103%                           | NI         | NI          | NI          | NI          | 101%        | 87%        | NI          | 92%                               | NI          | NI         | NI          | NI         | NI          | NI        | NI          |
| 39,227,903                    | rs6124323 | 88%                            | NI         | NI          | 98%         | NI          | 102%        | 86%        | NI          | 92%                               | NI          | NI         | NI          | NI         | NI          | NI        | 101%        |
| 39,263,536                    | rs2235367 | NI                             | NI         | NI          | NI          | NI          | NI          | 100%       | NI          | 96%                               | NI          | NI         | NI          | NI         | NI          | NI        | NI          |
| 39,348,159                    | rs6029610 | NI                             | NI         | NI          | NI          | NI          | 101%        | 100%       | NI          | NI                                | NI          | NI         | NI          | NI         | NI          | NI        | 100%        |
| 39,382,799                    | rs4812493 | NI                             | NI         | NI          | 94%         | NI          | 101%        | NI         | NI          | NI                                | NI          | NI         | NI          | NI         | NI          | NI        | 93%         |
| 39,402,927                    | rs6029636 | NI                             | 102%       | NI          | 95%         | 101%        | 102%        | 103%       | NI          | NI                                | NI          | 101%       | NI          | NI         | NI          | NI        | 99%         |
| 39,436,751                    | rs2072966 | 88%                            | 97%        | NI          | NI          | 97%         | NI          | NI         | NI          | NI                                | NI          | 93%        | 104%        | NI         | NI          | NI        | NI          |
| <b>Average allelic ratio</b>  |           | <b>90%</b>                     | <b>99%</b> | <b>102%</b> | <b>100%</b> | <b>101%</b> | <b>102%</b> | <b>95%</b> | <b>100%</b> | <b>95%</b>                        | <b>101%</b> | <b>99%</b> | <b>101%</b> | <b>99%</b> | <b>103%</b> | <b>NI</b> | <b>100%</b> |
| <b>Standard deviation (%)</b> |           | <b>9%</b>                      | <b>3%</b>  | <b>2%</b>   | <b>4%</b>   | <b>2%</b>   | <b>1%</b>   | <b>5%</b>  | <b>3%</b>   | <b>6%</b>                         | <b>0%</b>   | <b>4%</b>  | <b>3%</b>   | <b>4%</b>  | <b>1%</b>   | <b>NI</b> | <b>3%</b>   |

\*Entries represent the allelic ratios of the indicated SNPs. The values in DNA from normal individuals was 100% +/- 4.40%. Allelic ratios less than 2 standard deviations (SD) from the mean (i.e., <91.2%) are highlighted in red. A tumor was considered to exhibit LOH if more than 3/4 of the informative SNPs exhibited allelic ratios <91.2%. NI: Non-informative, i.e., the SNP was not heterozygous in the normal cells of the patient (see Supplemental material, Materials and Methods).



| <b>Table S4. Synthetic peptides assessed for antibody reactivity</b> |                                |                 |
|----------------------------------------------------------------------|--------------------------------|-----------------|
| <b>Peptide ID</b>                                                    | <b>RPC1 amino acid numbers</b> | <b>Sequence</b> |
| 1                                                                    | 1-15                           | MVKEQFRETDVAKKI |
| 2                                                                    | 6-20                           | FRETDVAKKISHICF |
| 3                                                                    | 11-25                          | VAKKISHICFGMKSP |
| 4                                                                    | 16-30                          | SHICFGMKSPEEMRQ |
| 5                                                                    | 21-35                          | GMKSPEEMRQQAHIQ |
| 6                                                                    | 26-40                          | EEMRQQAHIQVVSKN |
| 7                                                                    | 31-45                          | QAHIQVVSKNLYSQD |
| 8                                                                    | 36-50                          | VVSKNLYSQDNQHAP |
| 9                                                                    | 41-55                          | LYSQDNQHAPPLYGV |
| 10                                                                   | 46-60                          | NQHAPPLYGVLDHRM |
| 11                                                                   | 51-65                          | LLYGVLDHRMGTSEK |
| 12                                                                   | 56-70                          | LDHRMGTSEKDRPCE |
| 13                                                                   | 61-75                          | GTSEKDRPCETCGKN |
| 14                                                                   | 66-80                          | DRPCETCGKNLADCL |
| 15                                                                   | 71-85                          | TCGKNLADCLGHYGY |
| 16                                                                   | 76-90                          | LADCLGHYGYIDLEL |
| 17                                                                   | 81-95                          | GHYGYIDLELPCFHV |
| 18                                                                   | 86-100                         | IDLELPCFHVGYFRA |
| 19                                                                   | 91-105                         | PCFHVGYFRAVIGIL |
| 20                                                                   | 96-110                         | GYFRAVIGILQMICK |
| 21                                                                   | 101-115                        | VIGILQMICKTCCHI |
| 22                                                                   | 106-120                        | QMICKTCCHIMLSQE |
| 23                                                                   | 111-125                        | TCCHIMLSQEEKKQF |
| 24                                                                   | 116-130                        | MLSQEEKKQFLDYLK |
| 25                                                                   | 121-135                        | EKKQFLDYLKRPGLT |
| 26                                                                   | 126-140                        | LDYLRPGLTYLQKR  |
| 27                                                                   | 131-145                        | RPGLTYLQKRGLKKK |
| 28                                                                   | 136-150                        | YLQKRGLKKKISDKC |
| 29                                                                   | 141-155                        | GLKKKISDKCRKKNI |
| 30                                                                   | 146-160                        | ISDKCRKKNICHHCG |
| 31                                                                   | 151-165                        | RKKNICHHCGAFNGT |
| 32                                                                   | 156-170                        | CHHCGAFNGTVKKCG |
| 33                                                                   | 161-175                        | AFNGTVKKCGLLKII |
| 34                                                                   | 166-180                        | VKKCGLLKIIHEKYK |
| 35                                                                   | 171-185                        | LLKIIHEKYKTNKKV |
| 36                                                                   | 176-190                        | HEKYKTNKKVVDPIV |
| 37                                                                   | 181-195                        | TNKKVVDPIVSNFLQ |
| 38                                                                   | 186-200                        | VDPIVSNFLQSFETA |
| 39                                                                   | 191-205                        | SNFLQSFETAIEHNK |
| 40                                                                   | 196-210                        | SFETAIEHNKEVEPL |
| 41                                                                   | 201-215                        | IEHNKEVEPLLGRAQ |
| 42                                                                   | 206-220                        | EVEPLLGRAQENLNP |
| 43                                                                   | 211-225                        | LGRAQENLNPLVVLN |
| 44                                                                   | 216-230                        | ENLNPLVVLNLFKRI |
| 45                                                                   | 221-235                        | LVVLNLFKRIPAEDV |
| 46                                                                   | 226-240                        | LFKRIPAEDVPLLLM |
| 47                                                                   | 231-245                        | PAEDVPLLLMNPEAG |
| 48                                                                   | 236-250                        | PLLLMNPEAGKPSDL |
| 49                                                                   | 241-255                        | NPEAGKPSDLILTRL |

|     |         |                  |
|-----|---------|------------------|
| 50  | 246-260 | KPSDLILTRLLVPPL  |
| 51  | 251-265 | ILTRLLVPPLCIRPS  |
| 52  | 256-270 | LVPPLCIRPSVVSDL  |
| 53  | 261-275 | CIRPSVVSDLKSGTN  |
| 54  | 266-280 | VVSDLKSGTNEDDLT  |
| 55  | 271-285 | KSGTNEDDLTMKLTE  |
| 56  | 276-290 | EDDLTMKLTEIIFLN  |
| 57  | 281-295 | MKLTEIIFLNDVIKK  |
| 58  | 286-300 | IIFLNDVIKKHRISG  |
| 59  | 291-305 | DVIKKHRISGAKTQM  |
| 60  | 296-310 | HRISGAKTQMIMEDW  |
| 61  | 301-315 | AKTQMIMEDWDFLQL  |
| 62  | 306-320 | IMEDWDFLQLQCALY  |
| 63  | 311-325 | DFLQLQCALYINSEL  |
| 64  | 316-330 | QCALYINSELGPIPL  |
| 65  | 321-335 | INSELGPIPLNMAPK  |
| 66  | 326-340 | SGIPLNMAPKKWTRG  |
| 67  | 331-345 | NMAPKKWTRGFVQRL  |
| 68  | 336-350 | KWTRGFVQRLKQKQG  |
| 69  | 341-355 | FVQRLKQKQGRFRGN  |
| 70  | 346-360 | KGKQGRFRGNLSGKR  |
| 71  | 351-365 | RFRGNLSGKRVDGFSG |
| 72  | 356-370 | LSGKRVDGFSGRTVIS |
| 73  | 361-375 | VDGFSGRTVISDPNL  |
| 74  | 366-380 | RTVISDPNLRIDEV   |
| 75  | 371-385 | PDPNLRIDEVAVPVH  |
| 76  | 376-390 | RIDEVAVPVHVAKIL  |
| 77  | 381-395 | AVPVHVAKILTFPEK  |
| 78  | 386-400 | VAKILTFPEKVNKAN  |
| 79  | 391-405 | TFPEKVNKANINFLR  |
| 80  | 396-410 | VNKANINFLRKLQVQ  |
| 81  | 401-415 | INFLRKLQVQNGPEVH |
| 82  | 406-420 | KLQVQNGPEVHPGANF |
| 83  | 411-425 | GPEVHPGANFIQQRH  |
| 84  | 416-430 | PGANFIQQRHTQMKR  |
| 85  | 421-435 | IQQRHTQMKRFLKYG  |
| 86  | 426-440 | TQMKRFLKYGNREKM  |
| 87  | 431-445 | FLKYGNREKMAQELK  |
| 88  | 436-450 | NREKMAQELKYGDIV  |
| 89  | 441-455 | AQELKYGDIVERHLI  |
| 90  | 446-460 | YGDIVERHLIDGDVV  |
| 91  | 451-465 | ERHLIDGDVVLFNQR  |
| 92  | 456-470 | DGDVVLFNQRPSLHK  |
| 93  | 461-475 | LFNRQPSLHKLSIMA  |
| 94  | 466-480 | PSLHKLSIMAHLARV  |
| 95  | 471-485 | LSIMAHLARVKPHRT  |
| 96  | 476-490 | HLARVKPHRTFRFNE  |
| 97  | 481-495 | KPHRTFRFNECVCTP  |
| 98  | 486-500 | FRFNECVCTPYNADF  |
| 99  | 491-505 | CVCTPYNADFDGDEM  |
| 100 | 496-510 | YNADFDGDEMNLHLP  |
| 101 | 501-515 | DGDEMNLHLPQTEEA  |

|     |         |                 |
|-----|---------|-----------------|
| 102 | 506-520 | NLHLPQTEEAKAEAL |
| 103 | 511-525 | QTEEAKAEALVLMGT |
| 104 | 516-530 | KAEALVLMGTKANLV |
| 105 | 521-535 | VLMGTKANLVTPRNG |
| 106 | 526-540 | KANLVTPRNGEPLIA |
| 107 | 531-545 | TPRNGEPLIAAIQDF |
| 108 | 536-550 | EPLIAAIQDFLTGAY |
| 109 | 541-555 | AIQDFLTGAYLLTLK |
| 110 | 546-560 | LTGAYLLTLKDFFD  |
| 111 | 551-565 | LLTLKDFFDRAKAC  |
| 112 | 556-570 | DFFDRAKACQIIAS  |
| 113 | 561-575 | RAKACQIIASILVGK |
| 114 | 566-580 | QIIASILVGKDEKIK |
| 115 | 571-585 | ILVGKDEKIKVRLPP |
| 116 | 576-590 | DEKIKVRLPPPTILK |
| 117 | 581-595 | VRLPPPTILKPVTLW |
| 118 | 586-600 | PTILKPVTLWTGKQI |
| 119 | 591-605 | PVTLWTGKQIFSVIL |
| 120 | 596-610 | TGKQIFSVILRPSDD |
| 121 | 601-615 | FSVILRPSDDNPVRA |
| 122 | 606-620 | RPSDDNPVRANLRTK |
| 123 | 611-625 | NPVRANLRTKGKQYC |
| 124 | 616-630 | NLRTKGKQYCGKGED |
| 125 | 621-635 | GKQYCGKGEDLCAND |
| 126 | 626-640 | GKGEDLCANDSYVTI |
| 127 | 631-645 | LCANDSYVTIQNSEL |
| 128 | 636-650 | SYVTIQNSELMMSGM |
| 129 | 641-655 | QNSELMMSGMDKGTL |
| 130 | 646-660 | MSGMDKGTLGSGSK  |
| 131 | 651-665 | DKGTLGSGSKNNIFY |
| 132 | 656-670 | GSGSKNNIFYILLRD |
| 133 | 661-675 | NNIFYILLRDWGQNE |
| 134 | 666-680 | ILLRDWGQNEAADAM |
| 135 | 671-685 | WGQNEAADAMSRLAR |
| 136 | 676-690 | AADAMSRLARLAPVY |
| 137 | 681-695 | SRLARLAPVYLSNRG |
| 138 | 686-700 | LAPVYLSNRGFSIGI |
| 139 | 691-705 | LSNRGFSIGIGDVTP |
| 140 | 696-710 | FSIGIGDVTPGQGLL |
| 141 | 701-715 | GDVTPGQGLLKAKYE |
| 142 | 706-720 | GQGLLKAKYELLNAG |
| 143 | 711-725 | KAKYELLNAGYKKCD |
| 144 | 716-730 | LLNAGYKKCDEYIEA |
| 145 | 721-735 | YKKCDEYIEALNTGK |
| 146 | 726-740 | EYIEALNTGKLQQQP |
| 147 | 731-745 | LNTGKLQQQPGCTAE |
| 148 | 736-750 | LQQQPGCTAEETLEA |
| 149 | 741-755 | GCTAEETLEALILKE |
| 150 | 746-760 | ETLEALILKELSVIR |
| 151 | 751-765 | LILKELSVIRDHAGS |
| 152 | 756-770 | LSVIRDHAGSACLRE |
| 153 | 761-775 | DHAGSACLRELDKSN |

|     |           |                  |
|-----|-----------|------------------|
| 154 | 766-780   | ACLRELDKSN SPLTM |
| 155 | 771-785   | LDKSN SPLTMALCGS |
| 156 | 776-790   | SPLTMALCGSKGSFI  |
| 157 | 781-795   | ALCGSKGSFINISQM  |
| 158 | 786-800   | KGSFINISQMIACVG  |
| 159 | 791-805   | NISQMIACVGQQAIS  |
| 160 | 796-810   | IACVGQQAISGSRVP  |
| 161 | 801-815   | QQAISGSRVPDGFEN  |
| 162 | 806-820   | GSRVPDGFENRSLPH  |
| 163 | 811-825   | DGFENRSLPHFEKHS  |
| 164 | 816-830   | RSLPHFEKHSKLPAA  |
| 165 | 821-835   | FEKHSKLPAAKGFVA  |
| 166 | 826-840   | KLPAAKGFVANSFYS  |
| 167 | 831-845   | KGFVANSFYSGLTPT  |
| 168 | 836-850   | NSFYSGLTPTEFFFH  |
| 169 | 841-855   | GLTPTEFFFH TMAGR |
| 170 | 846-860   | EFFFH TMAGREGLVD |
| 171 | 851-865   | TMAGREGLVD TAVKT |
| 172 | 856-870   | EGLVD TAVKTAETGY |
| 173 | 861-875   | TAVKTAETGYMQRRL  |
| 174 | 866-880   | AETGYMQRRLVKSLE  |
| 175 | 871-885   | MQRRLVKSLEDLCSQ  |
| 176 | 876-890   | VKSLEDLCSQYDLTV  |
| 177 | 881-895   | DLCSQYDLTVRSSTG  |
| 178 | 886-900   | YDLTVRSSTGDIIQF  |
| 179 | 891-905   | RSSTGDIIQFIYGGD  |
| 180 | 896-910   | DIIQFIYGGDGLDPA  |
| 181 | 901-915   | IYGGDGLDPAAMEGK  |
| 182 | 906-920   | GLDPAAMEGKDEPLE  |
| 183 | 911-925   | AMEGKDEPLEFKRVL  |
| 184 | 916-930   | DEPLEFKRVL DNIKA |
| 185 | 921-935   | FKRVL DNIKAVFPCP |
| 186 | 926-940   | DNIKAVFPCPSEPAL  |
| 187 | 931-945   | VFPCPSEPALSKNEL  |
| 188 | 936-950   | SEPALSKNELILTTE  |
| 189 | 941-955   | SKNELILTTE SIMKK |
| 190 | 946-960   | ILTTESIMKKSEFLC  |
| 191 | 951-965   | SIMKKSEFLCKYMRA  |
| 192 | 956-970   | SEFLCKYMRAQMEPG  |
| 193 | 961-975   | KYMRAQMEPGSAVGA  |
| 194 | 966-980   | QMEPGSAVGALCAQS  |
| 195 | 971-985   | SAVGALCAQSIGEPG  |
| 196 | 976-990   | LCAQSIGEPGTQMTL  |
| 197 | 981-995   | IGEPGTQMTLKTFFH  |
| 198 | 986-1000  | TQMTLKTFFHFAGVAS |
| 199 | 991-1005  | KTFHFAGVASMNITL  |
| 200 | 996-1010  | AGVASMNITLGVPRI  |
| 201 | 1001-1015 | MNITLGVPRIKEIIN  |
| 202 | 1006-1020 | GVPRIKEIINASKAI  |
| 203 | 1011-1025 | KEIINASKAICQDSF  |
| 204 | 1016-1130 | ASKAICQDSFLQEIK  |
| 205 | 1021-1035 | CQDSFLQEIKKFIKG  |

|     |           |                  |
|-----|-----------|------------------|
| 206 | 1026-1040 | LQEIKKFIKGVSEKI  |
| 207 | 1031-1045 | KFIKGVSEKIKKTRD  |
| 208 | 1036-1050 | VSEKIKKTRDKYGIN  |
| 209 | 1041-1055 | KKTRDKYGINDNGTT  |
| 210 | 1046-1060 | KYGINDNGTTEPRVL  |
| 211 | 1051-1065 | DNGTTEPRVLYQLDR  |
| 212 | 1056-1070 | EPRVLYQLDRITPTQ  |
| 213 | 1061-1075 | YQLDRITPTQVEKFL  |
| 214 | 1066-1080 | ITPTQVEKFLETCRD  |
| 215 | 1071-1085 | VEKFLETCRDSTPII  |
| 216 | 1076-1090 | ETCRDSTPIITAQLD  |
| 217 | 1081-1095 | STPIITAQLDKDDDA  |
| 218 | 1086-1100 | TAQLDKDDDADYARL  |
| 219 | 1091-1105 | KDDDADYARLVKGRI  |
| 220 | 1096-1110 | DYARLVKGRIEKTLL  |
| 221 | 1101-1115 | VKGRIEKTLLGEISE  |
| 222 | 1106-1120 | EKTLLGEISEYIEEV  |
| 223 | 1111-1125 | GEISEYIEEVFLPDD  |
| 224 | 1116-1130 | YIEEVFLPDDCFILV  |
| 225 | 1121-1135 | FLPDDCFILVKLSLE  |
| 226 | 1126-1140 | CFILVKLSLERIRLL  |
| 227 | 1131-1145 | KLSLERIRLLRLEVN  |
| 228 | 1136-1150 | RIRLLRLEVNAETVR  |
| 229 | 1141-1155 | RLEVNAETVRYSICT  |
| 230 | 1146-1160 | AETVRYSICTSKLRV  |
| 231 | 1151-1165 | YSICTSKLRVKPGDV  |
| 232 | 1156-1170 | SKLRVKPGDVAHVGE  |
| 233 | 1161-1175 | KPGDVAHVGEAVVCV  |
| 234 | 1166-1180 | AVHGEAVVCVTPREN  |
| 235 | 1171-1185 | AVVCVTPRENSKSSM  |
| 236 | 1176-1190 | TPRENSKSSMYVVLQ  |
| 237 | 1181-1195 | SKSSMYVVLQFLKED  |
| 238 | 1186-1200 | YVVLQFLKEDLPKV   |
| 239 | 1191-1205 | FLKEDLPKVVVQGIP  |
| 240 | 1196-1210 | LPKVVVQGIPEVSRA  |
| 241 | 1201-1215 | VQGIPEVSRAVIHID  |
| 242 | 1206-1220 | EVSRAVIHIDEQSGK  |
| 243 | 1211-1225 | VIHIDEQSGKEKYKL  |
| 244 | 1216-1230 | EQSGKEKYKLLVEGD  |
| 245 | 1221-1235 | EKYKLLVEGDNLRAV  |
| 246 | 1226-1240 | LVEGDNLRAVMATHG  |
| 247 | 1231-1245 | NLRAVMATHGVKGR   |
| 248 | 1236-1250 | MATHGVKGRTRTTSN  |
| 249 | 1241-1255 | VKGRTRTTSNNTYEVE |
| 250 | 1246-1260 | TTSNNTYEVEKTLGI  |
| 251 | 1251-1265 | TYEVEKTLGIEAART  |
| 252 | 1256-1270 | KTLGIEAARTTIINE  |
| 253 | 1261-1275 | EAARTTIINEIQYTM  |
| 254 | 1266-1280 | TIINEIQYTMVNHGM  |
| 255 | 1271-1285 | IQYTMVNHGMSIDRR  |
| 256 | 1276-1290 | VNHGMSIDRRHVMLL  |
| 257 | 1281-1295 | SIDRRHVMLLSDLMT  |

|                  |           |                  |
|------------------|-----------|------------------|
| 258              | 1286-1300 | HVMLLSDLMTYKGEV  |
| 259              | 1291-1305 | SDLMTYKGEVLGITR  |
| 260              | 1296-1310 | YKGEVLGITRFLAK   |
| 261              | 1301-1315 | LGITRFLAKMKESV   |
| 262              | 1306-1320 | FGLAKMKESVLMLAS  |
| 263              | 1311-1325 | MKESVLMLASF EKTA |
| 264              | 1316-1330 | LMLASF EKTADHLFD |
| 265              | 1321-1335 | FEKTADHLFDAAYFG  |
| 266              | 1326-1340 | DHLFDAAYFGQKDSV  |
| 267              | 1331-1345 | AAAYFGQKDSVCGVSE |
| 268              | 1336-1350 | QKDSVCGVSECIIMG  |
| 269              | 1341-1355 | CGVSECIIMGIPMNI  |
| 270              | 1346-1360 | CIIMGIPMNIGTGLF  |
| 271              | 1351-1365 | IPMNIGTGLFKLLHK  |
| 272              | 1356-1370 | GTGLFKLLHKADRDP  |
| 273              | 1361-1375 | KLLHKADRDPNPPKR  |
| 274              | 1366-1380 | ADRDPNPPKRPLIFD  |
| 275              | 1371-1385 | NPPKRPLIFDTNEFH  |
| 276              | 1376-1390 | PLIFDTNEFHPLVT   |
| I104T mutant #1  | 91-105    | PCFHVGYFRAVIGTL  |
| I104T mutant #2  | 96-110    | GYFRAVIGTLQMICK  |
| I104T mutant #3  | 101-115   | VIGTLQMICKTCCHI  |
| E1072Q mutant #1 | 1061-1075 | YQLDRITPTQVQKFL  |
| E1072Q mutant #2 | 1066-1080 | ITPTQVQKFLETCDR  |
| E1072Q mutant #3 | 1071-1085 | VQKFLETCDRSTPII  |
| K1365N #1        | 1351-1365 | IPMNIGTGLFKLLHN  |
| K1365N #2        | 1356-1370 | GTGLFKLLHNADRDP  |
| K1365N #3        | 1361-1375 | KLLHNADRDPNPPKR  |

**Table S5. MHC types of the patients with *RPOL3A* mutations**

| <b>Patient #</b> | <b>MHC</b>                                           |
|------------------|------------------------------------------------------|
| SCL-2            | A 1/3<br>B 7/8<br>C 7/7<br>DRB1 3/15<br>DQB1 2/6     |
| SCL-4            | A 2/26<br>B 35/56<br>C 1/4<br>DRB1 1/11<br>DQB1 3/5  |
| SCL-42           | A 1/29<br>B 37/44<br>C 6/16<br>DRB1 7/10<br>DQB1 2/5 |

Table S6: Patient-specific MHC class I and class II peptides with highest predicted binding affinity

| Patient | Mutation | HLA Allele | wt peptide        | IC50      | mut peptide       | IC50       | Prediction Method |
|---------|----------|------------|-------------------|-----------|-------------------|------------|-------------------|
| SCL-2   | E1072Q   | A*0101     | TLGVPRIKEI        | 33377     | TLGVPRIKQI        | 32553      | ANN               |
|         |          | A*0301     | RIKEIINASK        | <b>78</b> | RIKQIINASK        | <b>58</b>  | ANN               |
|         |          | B*0702     | VPRIKEIINAS       | 1407      | VPRIKQIINAS       | 953        | CombLib           |
|         |          | B*0801     | VPRIKEII          | 759       | VPRIKQII          | 447        | CombLib           |
|         |          | C*0701     | ITLGVPRIKEI       | 1539      | ITLGVPRIKQI       | 2221       | ANN               |
|         |          | C*0702     | SMNITLGVPRIKEI    | 11367     | SMNITLGVPRIKQI    | 11587      | ANN               |
|         |          | DR*0301    | GVPRIKEIINASKAIST | 8235      | GVPRIKQIINASKAIST | 6854       | SMM               |
|         |          | DR*1501    | GVPRIKEIINASKAIST | 591       | GVPRIKQIINASKAIST | 416        | SMM               |
| SCL-4   | K1365N   | A*0201     | GLFKLLHKA         | <b>46</b> | GLFKLLHNA         | <b>27</b>  | ANN               |
|         |          | A*2601     | GTGLFKLLHK        | 31605     | GTGLFKLLHN        | 33271      | ANN               |
|         |          | B*3501     | FKLLHKAD          | 15618     | FKLLHNAD          | 4544       | SMM               |
|         |          | B*5601     | TGLFKLLHKA        | 24218     | TGLFKLLHNA        | 21971      | NetMHCpan         |
|         |          | C*0102     | KADRDPNPPKRPL     | 13637     | NADRDPNPPKRPL     | 21533      | NetMHCpan         |
|         |          | C*0401     | KLLHKADRDPNPPK    | 7973      | KLLHNADRDPNPPK    | 7794       | ANN               |
|         |          | DR*0101    | IGTGLFKLLHKADRDPN | <b>69</b> | IGTGLFKLLHNADRDPN | <b>4</b>   | CombLib           |
|         |          | DR*1101    | IGTGLFKLLHKADRDPN | <b>26</b> | IGTGLFKLLHNADRDPN | <b>113</b> | SMM               |
| SCL-42  | I104T    | A*0101     | VIGILQMI          | 21734     | VIGTLQMI          | 21971      | NetMHCpan         |
|         |          | A*2902     | YFRAVIGILQM       | 1158      | YFRAVIGTLQM       | 743        | NetMHCpan         |
|         |          | B*3701     | FRAVIGIL          | 3417      | FRAVIGTL          | 3237       | NetMHCpan         |
|         |          | B*4403     | AVIGILQM          | 22452     | AVIGTLQM          | 21501      | NetMHCpan         |
|         |          | C*0602     | FRAVIGILQMI       | <b>53</b> | FRAVIGTLQMI       | <b>40</b>  | ANN               |
|         |          | C*1601     | YFRAVIGILQM       | 822       | YFRAVIGTLQM       | 458        | NetMHCpan         |
|         |          | DR*0701    | FHVG YFRAVIGILQMI | <b>0</b>  | FHVG YFRAVIGTLQMI | <b>0.5</b> | CombLib           |
|         |          | DR*1001    | FHVG YFRAVIGILQMI | <b>54</b> | FHVG YFRAVIGTLQMI | <b>21</b>  | NetMHCpan         |

Moderate to high affinity peptides are highlighted in red

ANN= artificial neural network

CombLib = scoring matrices derived from combinatorial peptide libraries

SMM = stabilized matrix method



## References and Notes

1. A. Gabrielli, E. V. Avvedimento, T. Krieg, Scleroderma. *N. Engl. J. Med.* **360**, 1989–2003 (2009). [Medline doi:10.1056/NEJMra0806188](#)
2. M. L. Harris, A. Rosen, Autoimmunity in scleroderma: The origin, pathogenetic role, and clinical significance of autoantibodies. *Curr. Opin. Rheumatol.* **15**, 778–784 (2003). [Medline doi:10.1097/00002281-200311000-00016](#)
3. A. A. Shah, A. Rosen, L. Hummers, F. Wigley, L. Casciola-Rosen, Close temporal relationship between onset of cancer and scleroderma in patients with RNA polymerase I/III antibodies. *Arthritis Rheum.* **62**, 2787–2795 (2010). [Medline doi:10.1002/art.27549](#)
4. A. A. Shah, A. Rosen, Cancer and systemic sclerosis: Novel insights into pathogenesis and clinical implications. *Curr. Opin. Rheumatol.* **23**, 530–535 (2011). [Medline doi:10.1097/BOR.0b013e32834a5081](#)
5. Materials and methods are available as supplementary materials on *Science Online*.
6. A. G. Knudson, Hereditary cancer: Two hits revisited. *J. Cancer Res. Clin. Oncol.* **122**, 135–140 (1996). [Medline doi:10.1007/BF01366952](#)
7. Y. Kim, J. Ponomarenko, Z. Zhu, D. Tamang, P. Wang, J. Greenbaum, C. Lundegaard, A. Sette, O. Lund, P. E. Bourne, M. Nielsen, B. Peters, Immune epitope database analysis resource. *Nucleic Acids Res.* **40** (W1), W525–W530 (2012). [Medline doi:10.1093/nar/gks438](#)
8. P. Wang, J. Sidney, C. Dow, B. Mothé, A. Sette, B. Peters, A systematic assessment of MHC class II peptide binding predictions and evaluation of a consensus approach. *PLoS Comput. Biol.* **4**, e1000048 (2008). [Medline doi:10.1371/journal.pcbi.1000048](#)
9. P. Wang, J. Sidney, Y. Kim, A. Sette, O. Lund, M. Nielsen, B. Peters, Peptide binding predictions for HLA DR, DP and DQ molecules. *BMC Bioinformatics* **11**, 568 (2010). [Medline doi:10.1186/1471-2105-11-568](#)
10. Z. C. Ding, G. Zhou, Cytotoxic chemotherapy and CD4+ effector T cells: An emerging alliance for durable antitumor effects. *Clin. Dev. Immunol.* **2012**, 890178 (2012). [Medline doi:10.1155/2012/890178](#)
11. I. Mellman, G. Coukos, G. Dranoff, Cancer immunotherapy comes of age. *Nature* **480**, 480–489 (2011). [Medline doi:10.1038/nature10673](#)
12. P. K. Chattopadhyay, J. Yu, M. Roederer, A live-cell assay to detect antigen-specific CD4+ T cells with diverse cytokine profiles. *Nat. Med.* **11**, 1113–1117 (2005). [Medline doi:10.1038/nm1293](#)
13. M. Frensch, O. Arbach, D. Kirchhoff, B. Moewes, M. Worm, M. Rothe, A. Scheffold, A. Thiel, Direct access to CD4+ T cells specific for defined antigens according to CD154 expression. *Nat. Med.* **11**, 1118–1124 (2005). [Medline doi:10.1038/nm1292](#)
14. G. T. Nepom, J. H. Buckner, E. J. Novak, S. Reichstetter, H. Reijonen, J. Gebe, R. Wang, E. Swanson, W. W. Kwok, HLA class II tetramers: Tools for direct analysis of antigen-specific CD4+ T cells. *Arthritis Rheum.* **46**, 5–12 (2002). [Medline doi:10.1002/1529-0131\(200201\)46:1<5::AID-ART10063>3.0.CO;2-S](#)

15. K. J. Jackson, M. J. Kidd, Y. Wang, A. M. Collins, The Shape of the lymphocyte receptor repertoire: Lessons from the B cell receptor. *Front. Immunol.* **4**, 263 (2013).
16. M. G. McHeyzer-Williams, M. M. Davis, Antigen-specific development of primary and memory T cells in vivo. *Science* **268**, 106–111 (1995). [Medline](#)  
[doi:10.1126/science.7535476](https://doi.org/10.1126/science.7535476)
17. R. Buchbinder, A. Forbes, S. Hall, X. Dennett, G. Giles, Incidence of malignant disease in biopsy-proven inflammatory myopathy. A population-based cohort study. *Ann. Intern. Med.* **134**, 1087–1095 (2001). [Medline](#) [doi:10.7326/0003-4819-134-12-200106190-00008](https://doi.org/10.7326/0003-4819-134-12-200106190-00008)
18. S. A. Forbes, N. Bindal, S. Bamford, C. Cole, C. Y. Kok, D. Beare, M. Jia, R. Shepherd, K. Leung, A. Menzies, J. W. Teague, P. J. Campbell, M. R. Stratton, P. A. Futreal, COSMIC: Mining complete cancer genomes in the Catalogue of Somatic Mutations in Cancer. *Nucleic Acids Res.* **39** (Database), D945–D950 (2011). [Medline](#)  
[doi:10.1093/nar/gkq929](https://doi.org/10.1093/nar/gkq929)
19. H. A. Doyle, M. J. Mamula, Posttranslational modifications of self-antigens. *Ann. N. Y. Acad. Sci.* **1050**, 1–9 (2005). [Medline](#) [doi:10.1196/annals.1313.001](https://doi.org/10.1196/annals.1313.001)
20. M. J. Mamula, R. J. Gee, J. I. Elliott, A. Sette, S. Southwood, P. J. Jones, P. R. Blier, Isoaspartyl post-translational modification triggers autoimmune responses to self-proteins. *J. Biol. Chem.* **274**, 22321–22327 (1999). [Medline](#)  
[doi:10.1074/jbc.274.32.22321](https://doi.org/10.1074/jbc.274.32.22321)
21. R. H. Lin, M. J. Mamula, J. A. Hardin, C. A. Janeway Jr., Induction of autoreactive B cells allows priming of autoreactive T cells. *J. Exp. Med.* **173**, 1433–1439 (1991). [Medline](#)  
[doi:10.1084/jem.173.6.1433](https://doi.org/10.1084/jem.173.6.1433)
22. M. J. Mamula, S. Fatenejad, J. Craft, B cells process and present lupus autoantigens that initiate autoimmune T cell responses. *J. Immunol.* **152**, 1453–1461 (1994). [Medline](#)
23. M. L. Albert, R. B. Darnell, Paraneoplastic neurological degenerations: Keys to tumour immunity. *Nat. Rev. Cancer* **4**, 36–44 (2004). [Medline](#) [doi:10.1038/nrc1255](https://doi.org/10.1038/nrc1255)
24. C. Gaudin, F. Kremer, E. Angevin, V. Scott, F. Triebel, A hsp70-2 mutation recognized by CTL on a human renal cell carcinoma. *J. Immunol.* **162**, 1730–1738 (1999). [Medline](#)
25. R. F. Wang, X. Wang, A. C. Atwood, S. L. Topalian, S. A. Rosenberg, Cloning genes encoding MHC class II-restricted antigens: Mutated CDC27 as a tumor antigen. *Science* **284**, 1351–1354 (1999). [Medline](#) [doi:10.1126/science.284.5418.1351](https://doi.org/10.1126/science.284.5418.1351)
26. T. Wölfel, M. Hauer, J. Schneider, M. Serrano, C. Wölfel, E. Klehmann-Hieb, E. De Plaen, T. Hankeln, K. H. Meyer zum Büschenfelde, D. Beach, A p16INK4a-insensitive CDK4 mutant targeted by cytolytic T lymphocytes in a human melanoma. *Science* **269**, 1281–1284 (1995). [Medline](#) [doi:10.1126/science.7652577](https://doi.org/10.1126/science.7652577)
27. M. E. Engelhorn, J. A. Guevara-Patiño, G. Noffz, A. T. Hooper, O. Lou, J. S. Gold, B. J. Kappel, A. N. Houghton, Autoimmunity and tumor immunity induced by immune responses to mutations in self. *Nat. Med.* **12**, 198–206 (2006). [Medline](#)  
[doi:10.1038/nm1363](https://doi.org/10.1038/nm1363)

28. L. Casciola-Rosen, K. Nagaraju, P. Plotz, K. Wang, S. Levine, E. Gabrielson, A. Corse, A. Rosen, Enhanced autoantigen expression in regenerating muscle cells in idiopathic inflammatory myopathy. *J. Exp. Med.* **201**, 591–601 (2005). [Medline](#)  
[doi:10.1084/jem.20041367](https://doi.org/10.1084/jem.20041367)
29. R. D. Schreiber, L. J. Old, M. J. Smyth, Cancer immunoediting: Integrating immunity's roles in cancer suppression and promotion. *Science* **331**, 1565–1570 (2011). [Medline](#)  
[doi:10.1126/science.1203486](https://doi.org/10.1126/science.1203486)
30. S. Bernatsky, J. F. Boivin, L. Joseph, R. Rajan, A. Zoma, S. Manzi, E. Ginzler, M. Urowitz, D. Gladman, P. R. Fortin, M. Petri, S. Edworthy, S. Barr, C. Gordon, S. C. Bae, J. Sibley, D. Isenberg, A. Rahman, C. Aranow, M. A. Dooley, K. Steinsson, O. Nived, G. Sturfelt, G. Alarcón, J. L. Senécal, M. Zummer, J. Hanly, S. Ensworth, J. Pope, H. El-Gabalawy, T. McCarthy, Y. St Pierre, R. Ramsey-Goldman, A. Clarke, An international cohort study of cancer in systemic lupus erythematosus. *Arthritis Rheum.* **52**, 1481–1490 (2005).  
[Medline](#) [doi:10.1002/art.21029](https://doi.org/10.1002/art.21029)
31. E. Tatsis, E. Reinhold-Keller, K. Steindorf, A. C. Feller, W. L. Gross, Wegener's granulomatosis associated with renal cell carcinoma. *Arthritis Rheum.* **42**, 751–756 (1999). [Medline](#) [doi:10.1002/1529-0131\(199904\)42:4<751::AID-ANR19>3.0.CO;2-D](https://doi.org/10.1002/1529-0131(199904)42:4<751::AID-ANR19>3.0.CO;2-D)
32. B. Vogelstein, N. Papadopoulos, V. E. Velculescu, S. Zhou, L. A. Diaz Jr., K. W. Kinzler, Cancer genome landscapes. *Science* **339**, 1546–1558 (2013). [Medline](#)  
[doi:10.1126/science.1235122](https://doi.org/10.1126/science.1235122)
33. M. Burnet, Cancer—A Biological Approach. *BMJ* **1**, 841–847 (1957). [Medline](#)  
[doi:10.1136/bmj.1.5023.841](https://doi.org/10.1136/bmj.1.5023.841)
34. F. M. Burnet, The concept of immunological surveillance. *Prog. Exp. Tumor Res.* **13**, 1–27 (1970). [Medline](#)
35. S. A. Quezada, K. S. Peggs, Exploiting CTLA-4, PD-1 and PD-L1 to reactivate the host immune response against cancer. *Br. J. Cancer* **108**, 1560–1565 (2013). [Medline](#)  
[doi:10.1038/bjc.2013.117](https://doi.org/10.1038/bjc.2013.117)
36. M. DuPage, C. Mazumdar, L. M. Schmidt, A. F. Cheung, T. Jacks, Expression of tumour-specific antigens underlies cancer immunoediting. *Nature* **482**, 405–409 (2012). [Medline](#)  
[doi:10.1038/nature10803](https://doi.org/10.1038/nature10803)
37. H. Matsushita, M. D. Vesely, D. C. Koboldt, C. G. Rickert, R. Uppaluri, V. J. Magrini, C. D. Arthur, J. M. White, Y. S. Chen, L. K. Shea, J. Hundal, M. C. Wendl, R. Demeter, T. Wylie, J. P. Allison, M. J. Smyth, L. J. Old, E. R. Mardis, R. D. Schreiber, Cancer exome analysis reveals a T-cell-dependent mechanism of cancer immunoediting. *Nature* **482**, 400–404 (2012). [Medline](#) [doi:10.1038/nature10755](https://doi.org/10.1038/nature10755)
38. A. T. Masi, Subcommittee for scleroderma criteria of the American Rheumatism Association Diagnostic and Therapeutic Criteria Committee, Preliminary criteria for the classification of systemic sclerosis (scleroderma). *Arthritis Rheum.* **23**, 581–590 (1980). [Medline](#)  
[doi:10.1002/art.1780230510](https://doi.org/10.1002/art.1780230510)
39. P. J. Clements *et al.*, Skin thickness score in systemic sclerosis: An assessment of interobserver variability in 3 independent studies. *J. Rheumatol.* **20**, 1892–1896 (1993).  
[Medline](#)

40. E. C. LeRoy, C. Black, R. Fleischmajer, S. Jablonska, T. Krieg, T. A. Medsger Jr., N. Rowell, F. Wollheim, Scleroderma (systemic sclerosis): classification, subsets and pathogenesis. *J. Rheumatol.* **15**, 202–205 (1988). [Medline](#)
41. J. Wu, H. Matthaei, A. Maitra, M. Dal Molin, L. D. Wood, J. R. Eshleman, M. Goggins, M. I. Canto, R. D. Schulick, B. H. Edil, C. L. Wolfgang, A. P. Klein, L. A. Diaz Jr., P. J. Allen, C. M. Schmidt, K. W. Kinzler, N. Papadopoulos, R. H. Hruban, B. Vogelstein, Recurrent GNAS mutations define an unexpected pathway for pancreatic cyst development. *Sci. Transl. Med.* **3**, 92ra66 (2011). [Medline](#)  
[doi:10.1126/scitranslmed.3002543](https://doi.org/10.1126/scitranslmed.3002543)
42. D. S. Herman, G. K. Hovingh, O. Iartchouk, H. L. Rehm, R. Kucherlapati, J. G. Seidman, C. E. Seidman, Filter-based hybridization capture of subgenomes enables resequencing and copy-number detection. *Nat. Methods* **6**, 507–510 (2009). [Medline](#)  
[doi:10.1038/nmeth.1343](https://doi.org/10.1038/nmeth.1343)
43. I. Kinde, J. Wu, N. Papadopoulos, K. W. Kinzler, B. Vogelstein, Detection and quantification of rare mutations with massively parallel sequencing. *Proc. Natl. Acad. Sci. U.S.A.* **108**, 9530–9535 (2011). [Medline](#) [doi:10.1073/pnas.1105422108](https://doi.org/10.1073/pnas.1105422108)
44. L. A. Casciola-Rosen, A. F. Pluta, P. H. Plotz, A. E. Cox, S. Morris, F. M. Wigley, M. Petri, A. C. Gelber, A. Rosen, The DNA mismatch repair enzyme PMS1 is a myositis-specific autoantigen. *Arthritis Rheum.* **44**, 389–396 (2001). [Medline](#) [doi:10.1002/1529-0131\(200102\)44:2<389::AID-ANR58>3.0.CO;2-R](https://doi.org/10.1002/1529-0131(200102)44:2<389::AID-ANR58>3.0.CO;2-R)
